# Supplementary material for: Complexation of alkali metal and alkaline earth ions by anthracene based fluorophores with one and two appended monoaza coronand receptorsElectronic supplementary information (ESI) available: figs. S1–S20: additional emission spectra. See http://www.rsc.org/suppdata/dt/b2/b210269b/
Source: Royal Society of Chemistry journal article supplement (doi:10.1039/b210269b), 2003-01-28
Supplement: b210269b.doc [file b210269b.doc]

# Supplementary Material

Complexation of alkali metal and alkaline earth ions by anthracene based fluorophores with one and two appended monoaza coronand receptors

**Jason P. Geue, Nicholas J. Head, A. David Ward and Stephen F. Lincoln***

**Fig. S1**. The increase in emission of **1** (3.00  10-6 mol dm-3) with [Na+]total (1.00  10-6-4.00  10-4 mol dm-3) in acetonitrile *I* = 0.05 mol dm-3 (NEt4ClO4) and 298.2 K when excited at 381 nm. The lowest emission spectrum is that of **1**.

**Fig. S2**. The increase in emission of **1** (3.00  10-6 mol dm-3) with [K+]total (5.00  10-6-5.00  10‑3 mol dm-3) in acetonitrile *I* = 0.05 mol dm-3 (NEt4ClO4) and 298.2 K when excited at 375 nm. The lowest emission spectrum is that of **1**.

**Fig. S3**. The increase in emission of **1** (3.00  10-6 mol dm-3) with [Rb+]total (2.00  10-5-3.00  10-3 mol dm-3) in acetonitrile *I* = 0.05 mol dm-3 (NEt4ClO4) and 298.2 K when excited at 386 nm. The lowest emission spectrum is that of **1**.

**Fig. S4**. The increase in emission of **1** (3.00  10-6 mol dm-3) with [Cs+]total (5.00  10-5-4.00  10-3 mol dm-3) in acetonitrile *I* = 0.05 mol dm-3 (NEt4ClO4) and 298.2 K when excited at 382 nm. The lowest emission spectrum is that of **1**.

**Fig. S5**. The increase in emission of **1** (3.00  10-6 mol dm-3) with [Mg2+]total in acetonitrile and *I* = 0.05 mol dm-3 (NEt4ClO4) and 298.2 K when excited at 369 nm. The lowest emission spectrum is that of **1**.

**Fig. S6**. The increase in emission of **1** (3.00  10-6 mol dm-3) with [Ca2+]total (6.00  10-8-8.00  10-6 mol dm-3) in acetonitrile *I* = 0.05 mol dm-3 (NEt4ClO4) and 298.2 K when excited at 374 nm. The lowest emission spectrum is that of **1**.

**Fig. S7**. The increase in emission of **1** (3.00  10-6 mol dm-3) with [Sr2+]total (1.00  10-7-9.00  10-6 mol dm-3) in acetonitrile *I* = 0.05 mol dm-3 (NEt4ClO4) and 298.2 K when excited at 375 nm. The lowest emission spectrum is that of **1**.

**Fig. S8**. The increase in emission of **1** (3.00  10-6 mol dm-3) with [Ba2+]total (1.00  10-7-9.00  10-6 mol dm-3) in acetonitrile *I* = 0.05 mol dm-3 (NEt4ClO4) and 298.2 K when excited at 374 nm. The lowest emission spectrum is that of **1**.

**Fig. S9**. Emission variation of **1** (3.00  10-6 moldm-3) at 406 nm with increase in [Ca2+] in acetonitrile and *I* = 0.05 mol dm-3 (NEt4ClO4) and 298.2 K when excited at 374 nm.

**Fig. S10**. Emission variation of **1** (3.00  10-6 moldm-3) at 406 nm with increase in [Sr2+] in acetonitrile and *I* = 0.05 mol dm-3 (NEt4ClO4) and 298.2 K when excited at 375 nm.

**Fig. S11**. Emission variation of **1** (3.00  10-6 moldm-3) at 406 nm with increase in [Ba2+] in acetonitrile and *I* = 0.05 mol dm-3 (NEt4ClO4) and 298.2 K when excited at 374 nm.

**Fig. S12**. The increase in emission of **2** (3.00  10-6 mol dm-3) with [Li+]total (1.00  10-6-8.00  10-4 mol dm-3) in acetonitrile *I* = 0.05 mol dm-3 (NEt4ClO4) and 298.2 K when excited at 385 nm. The lowest emission spectrum is that of **2**.

**Fig. S13**. The increase in emission of **2** (3.00  10-6 mol dm-3) with [Na+]total (1.00  10-6-3.00  10-3 mol dm-3) in acetonitrile *I* = 0.05 mol dm-3 (NEt4ClO4) and 298.2 K when excited at 382 nm. The lowest emission spectrum is that of **2**.

**Fig. S14**. The increase in emission of **2** (3.00  10-6 mol dm-3) with [Rb+]total (1.00  10-5-3.00  10-3 mol dm-3) in acetonitrile *I* = 0.05 mol dm-3 (NEt4ClO4) and 298.2 K when excited at 376 nm. The lowest emission spectrum is that of **2**.

**Fig. S15**. The increase in emission of **2** (3.00  10-6 mol dm-3) with [Ca2+]total (5.00  10-7-8.00  10-5 mol dm-3) in acetonitrile *I* = 0.05 mol dm-3 (NEt4ClO4) and 298.2 K when excited at 383 nm. The lowest emission spectrum is that of **2**.

**Fig. S16**. The increase in emission of **2** (3.00  10-6 mol dm-3) with [Sr2+]total (5.00  10-7-8.00  10-5 mol dm-3) in acetonitrile *I* = 0.05 mol dm-3 (NEt4ClO4) and 298.2 K when excited at 384 nm. The lowest emission spectrum is that of **2**.

**Fig. S17**. The increase in emission of **2** (3.00  10-6 mol dm-3) with [Ba2+]total (1.00  10-6-1.00  10-4 mol dm-3) in acetonitrile *I* = 0.05 mol dm-3 (NEt4ClO4) and 298.2 K when excited at 386 nm. The lowest emission spectrum is that of **2**.

**Fig. S18**. The biphasic emission variation of **2** (3.00  10-6 moldm-3) at 408 nm with increase in [Ca2+]total in acetonitrile and *I* = 0.05 mol dm-3 (NEt4ClO4) and 298.2 K when excited at 383 nm.

**Fig. S19**. The biphasic emission variation of **2** (3.00  10-6 moldm-3) at 411 nm with increase in [Sr2+]total in acetonitrile and *I* = 0.05 mol dm-3 (NEt4ClO4) and 298.2 K when excited at 384 nm.

**Fig. S20**. The biphasic emission variation of **2** (3.00  10-6 moldm-3) at 410 nm with increase in [Ba2+]total in acetonitrile and *I* = 0.05 mol dm-3 (NEt4ClO4) and 298.2 K when excited at 386 nm.
